# Supplementary material for: OmpA Binding Mediates the Effect of Antimicrobial Peptide LL-37 on Acinetobacter baumannii
Source: PubMed Central journal article supplement (PMC4618850; doi:10.1371/journal.pone.0141107), 2015-10-20
Supplement: pone.0141107.s004.pdf [file pone.0141107.s004.pdf]

Bacterial strains, plasmids and primers used in this study

| Strains              |                      | Relevant feature(s)                                                                                                                                          | Source or reference |
|----------------------|----------------------|--------------------------------------------------------------------------------------------------------------------------------------------------------------|---------------------|
| A. baumannii strains | ATCC 17978           | Wild-type strain                                                                                                                                             | ATCC                |
|                      | $\Delta ompA$        | Derived from ATCC 17978. <i>ompA</i> mutant obtained by <i>kan<sup>r</sup></i> gene replacement                                                              | This study          |
|                      | 17978CR (LPS defect) | Induced colistin resistant ATCC 17978                                                                                                                        | [1]                 |
| E. coli strains      | BL21 (DE3) pLysS     | <i>F<sup>-</sup> ompT gal dcm lon hsdS<sub>B</sub>(r<sub>B</sub><sup>-</sup> m<sub>B</sub><sup>-</sup>) <math>\lambda</math>(DE3) pLysS(Cam<sup>r</sup>)</i> | Novagen             |
|                      | BL21 OmpA            | BL21 (DE3) pLysS carrying plasmid pET23a-OmpA                                                                                                                | This study          |
|                      | XL1 blue             | <i>recA1 endA1 gyrA96 thi-1 hsdR17 supE44 relA1 lac [F' proAB lacI<sup>q</sup>ZAM15 Tn10 (Tet<sup>r</sup>)]</i>                                              | Stratagene          |
|                      | S17-1 (ATCC 47055)   | <i>thi pro hsdR hsdM recA[RP42-Tc::Mu-Km::Tn7 (Tp<sup>r</sup>Sm<sup>r</sup>)Tra<sup>+</sup>]</i>                                                             | ATCC                |
|                      | S17-1 ompA           | S17-1 carrying plasmid pEX18Tc-OmpAUD-Kan                                                                                                                    | This study          |
| Plasmids             |                      | Relevant feature(s)                                                                                                                                          | Source or reference |
| pET23a               |                      | Subcloning vector with a T7 promoter, N-terminal T7 tag and C-terminal 6xHis tag; <i>amp<sup>r</sup></i>                                                     | Novagen             |
| pET23a-OmpA          |                      | pET23a carrying <i>Acinetobacter baumannii</i> ATCC 17978 A1S_2840                                                                                           | This study          |
| pEX18Tc              |                      | Suicide vector, containing <i>sacB</i> , Tc <sup>r</sup>                                                                                                     |                     |
| pEX18Tc-OmpAUD-Kan   |                      | pEX18Tc containing <i>ompA</i> upstream and downstream fragments joined by <i>kan<sup>r</sup></i> cassette                                                   | This study          |
| Primers              |                      | Relevant feature(s)                                                                                                                                          | Source or reference |
| ompA5'F              |                      | ATATG <u>T</u> CGACACCACCCATAGCAGTACGAG                                                                                                                      | This study          |
| ompA5'R              |                      | ATATG <u>G</u> ATCCTTGTTGTTCAAGCTCAGCCT                                                                                                                      | This study          |
| ompA3'F              |                      | ATATG <u>G</u> TACCTACGATGTTGAGCACGAGGT                                                                                                                      | This study          |
| ompA3'R              |                      | ATAAG <u>A</u> GCTCGACGCCATTGAACGGAA                                                                                                                         | This study          |

|            |                                      |            |
|------------|--------------------------------------|------------|
|            | AGT                                  |            |
| ompA int F | CCAACACAACAATGGCGGTA                 | This study |
| ompA int R | TCTACTACAGGAGCAGCAGG                 | This study |
| ompAExF    | ATATGAATTCTACTTTCCAAGACAGC<br>CA     | This study |
| ompAExR    | ATATGCGGCCGCTTGAGCTGCTGCAGGA<br>GCTG | This study |
| kanF       | ATATGGATCCCCGGAATTGCCAGCTGGG<br>GC   | This study |
| kanR       | ATATGGTACCTCAGAAGAACTCGTCAAG<br>AA   | This study |

1. Kuo HY, Chang KC, Kuo JW, Yueh HW, Liou ML (2012) Imipenem: a potent inducer of multidrug resistance in *Acinetobacter baumannii*. Int J Antimicrob Agents 39: 33-38.
